# Supplementary material
Source: PubMed Central journal article supplement (PMC3967796)
Supplement: NIHMS548786-supplement-Supplementary_Figures_1_to_7_and_Supplementary_Tables_1-2.pdf [file NIHMS548786-supplement-Supplementary_Figures_1_to_7_and_Supplementary_Tables_1-2.pdf]

# Supplementary Figure 1

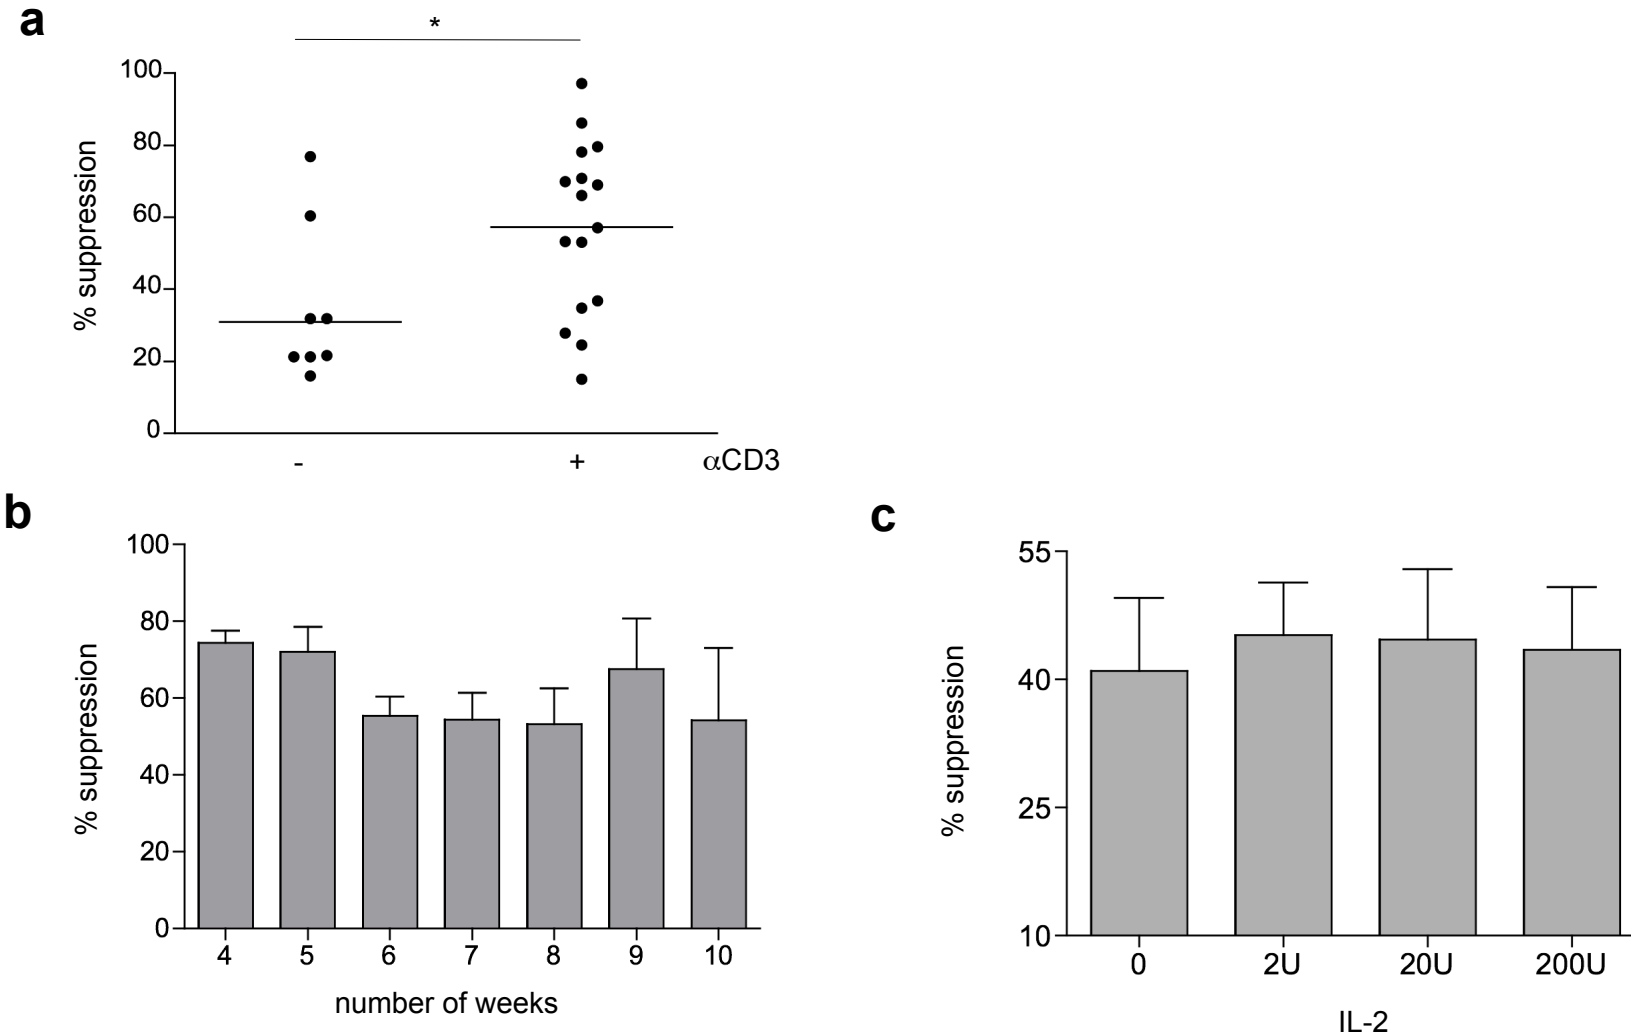

Supplementary figure 1: (A) Initial stimulation of CD8<sup>+</sup> line with Visilizumab increases suppressor activity. \*,  $p < 0.05$ , using an unpaired T test with Welch's correction. (B) Suppressor activity of CD8 lines was not affected by time in culture. (C) IL-2 was added to the suppressor assay in increasing amounts. IL-2 did not change the ability of CD8<sup>+</sup> Ts cells to mediate suppression. The effect of IL-2 was tested in 9 different NL lines.

## Supplementary Figure 2.a

CD line

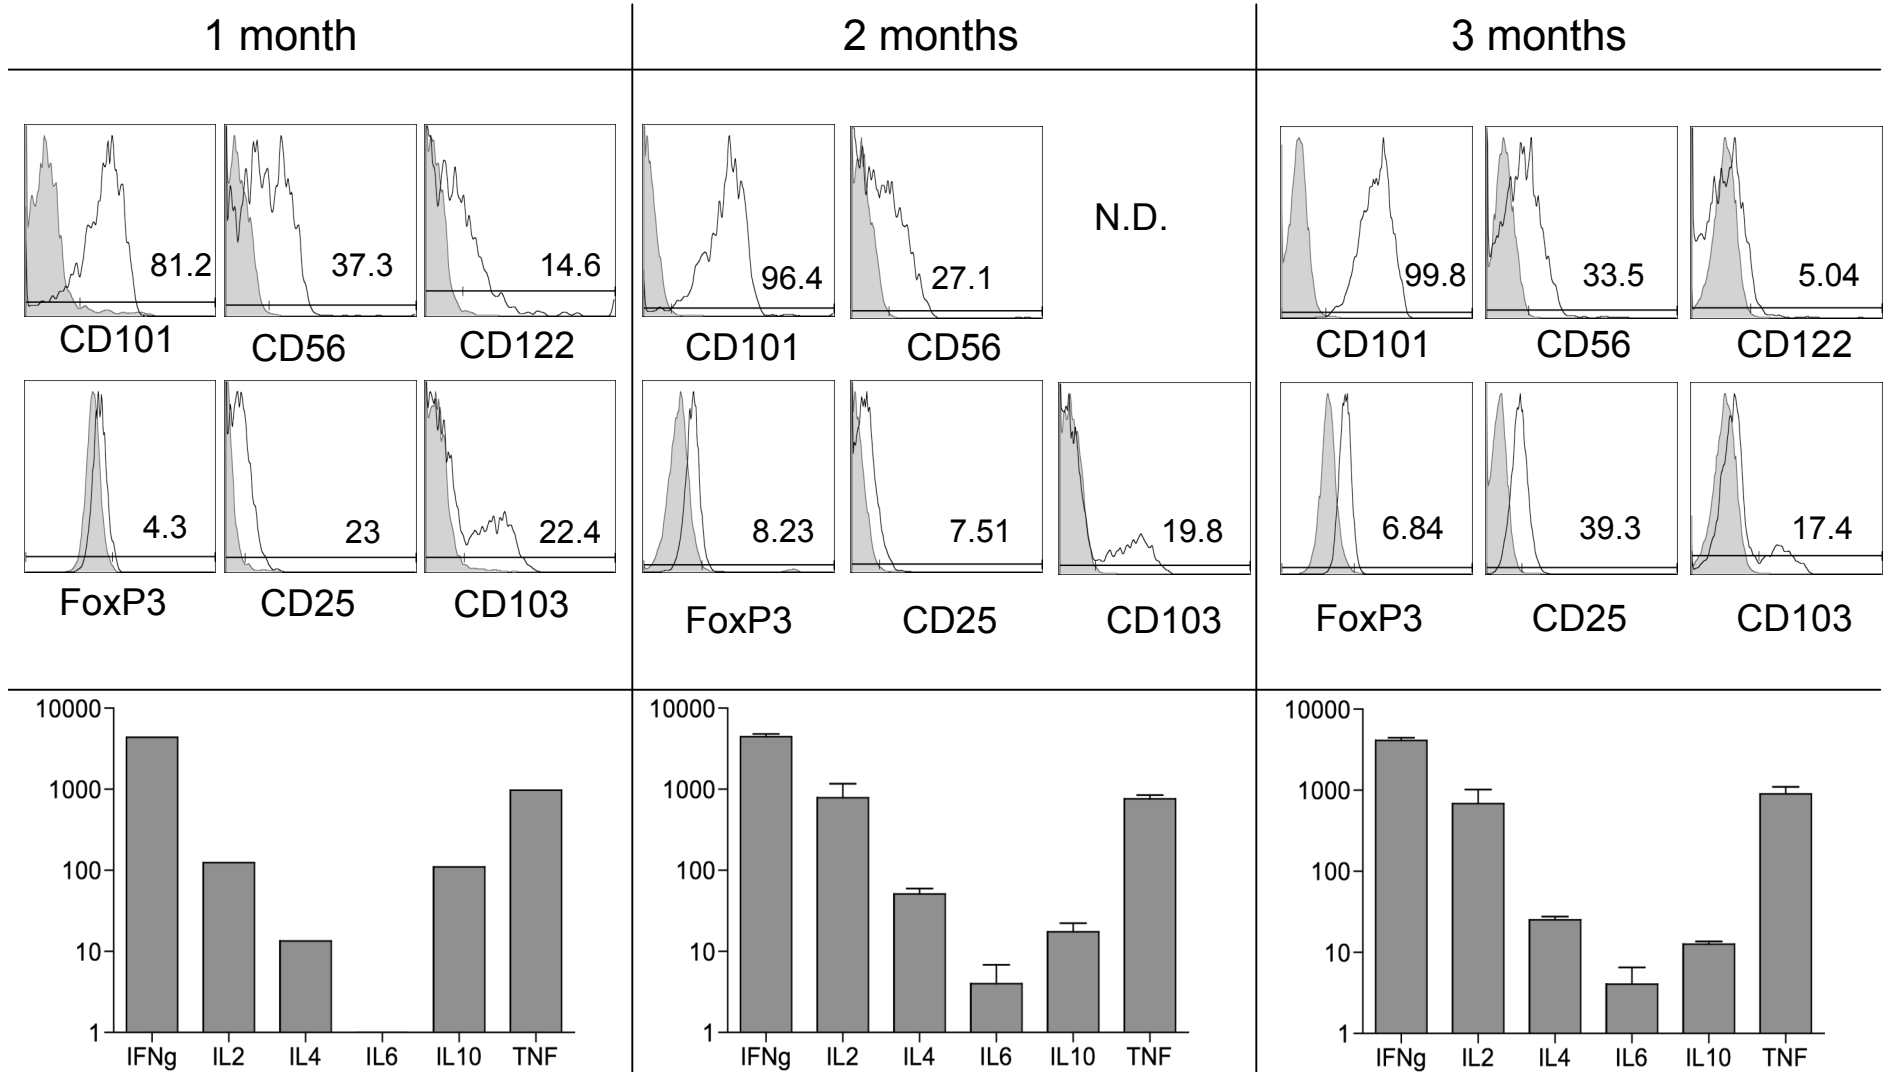

Supplementary figure 2: Characterization of CD8<sup>+</sup> T<sub>s</sub> lines over time. Surface staining, cytokines secretion profile and suppressor activity of CD8<sup>+</sup> T<sub>s</sub> lines were measured at 1, 2 and 3 months in culture with IL7 and IL15. Surface expression of CD8 $\alpha\beta$ , CD3,  $\alpha 4\beta 7$ , CD101, CD56, CD122, FoxP3, CD25, CD103. open histograms, specific staining (antibodies to markers below the plots); filled histograms, isotype-matched control antibodies. Numbers adjacent to the outlined areas and above lines indicate the percentage of cells in the gate. Suppressor activity was unaffected over time (not shown). Cytokine levels in supernatants were measured 72h post aCD3/CD28 stimulation by Cytometric Bead Array. (A) CD CD8<sup>+</sup>T<sub>s</sub> lines. (B) NL CD8<sup>+</sup> T<sub>s</sub> lines.

# Supplementary Figure 2.b

NL line

1 month

2 months

3 months

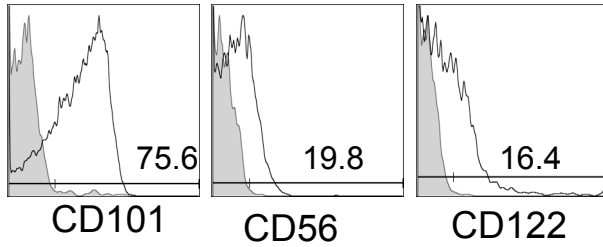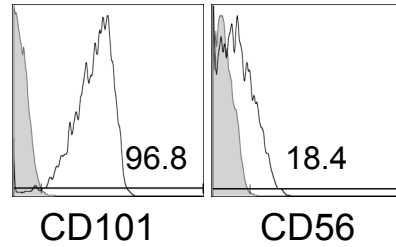

N.D.

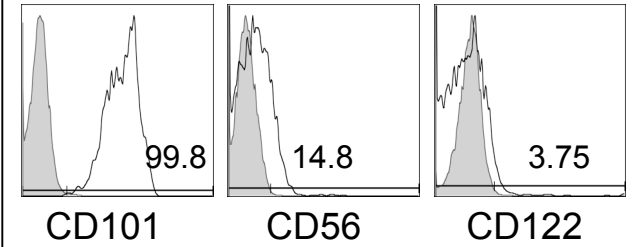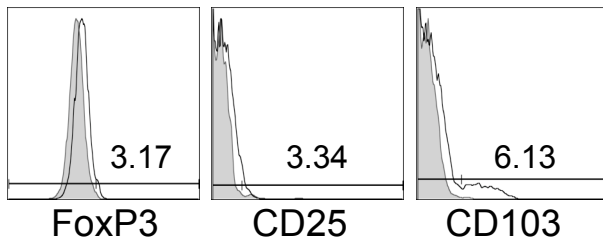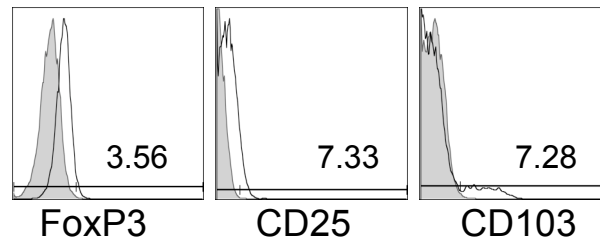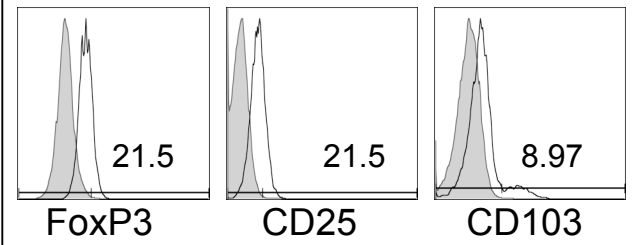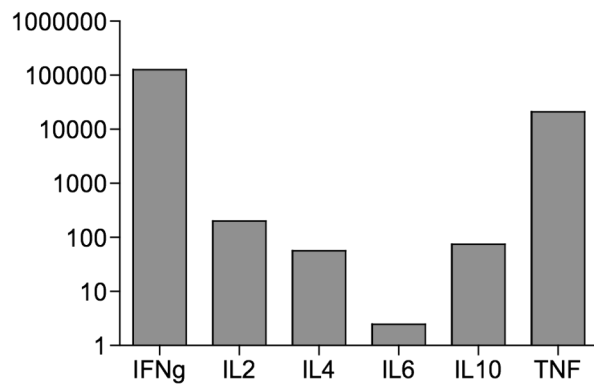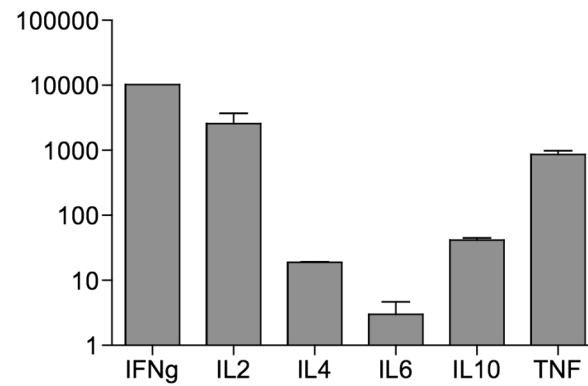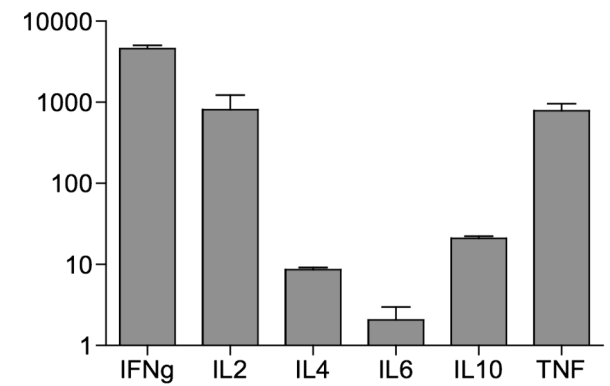

## Supplementary Figure 3

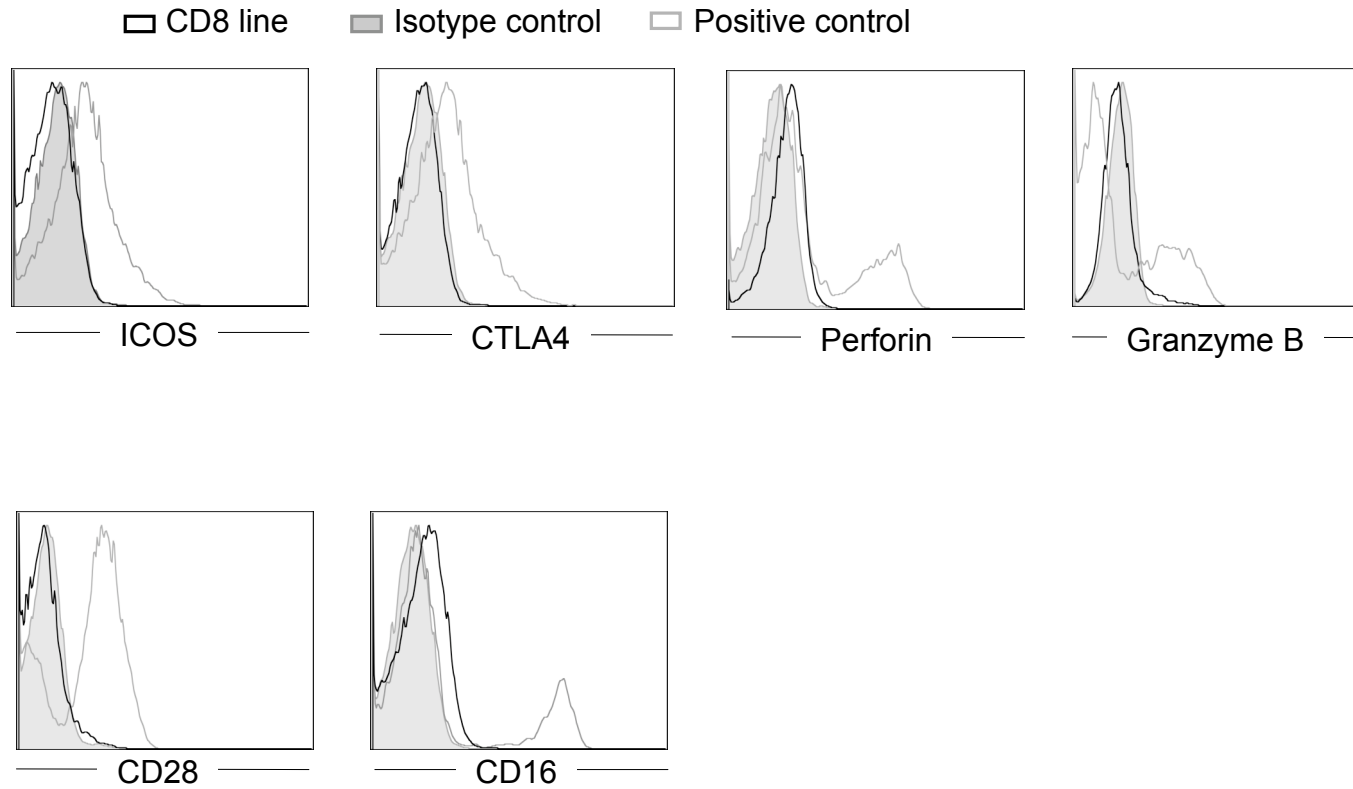

Supplementary figure 3: Surface staining of CD8<sup>+</sup> Ts lines from NL, UC and CD subgroups is equivalent. There is no surface or intracytoplasmic expression of ICOS, CTLA4, perforin, granzyme B, CD28 and CD16. *open black histograms*, specific staining (antibodies to markers below the plots); *filled histograms*, isotype-matched control antibodies; *open grey histograms*, positive staining control.

# Supplementary Figure 4a

## Positive correlation analysis

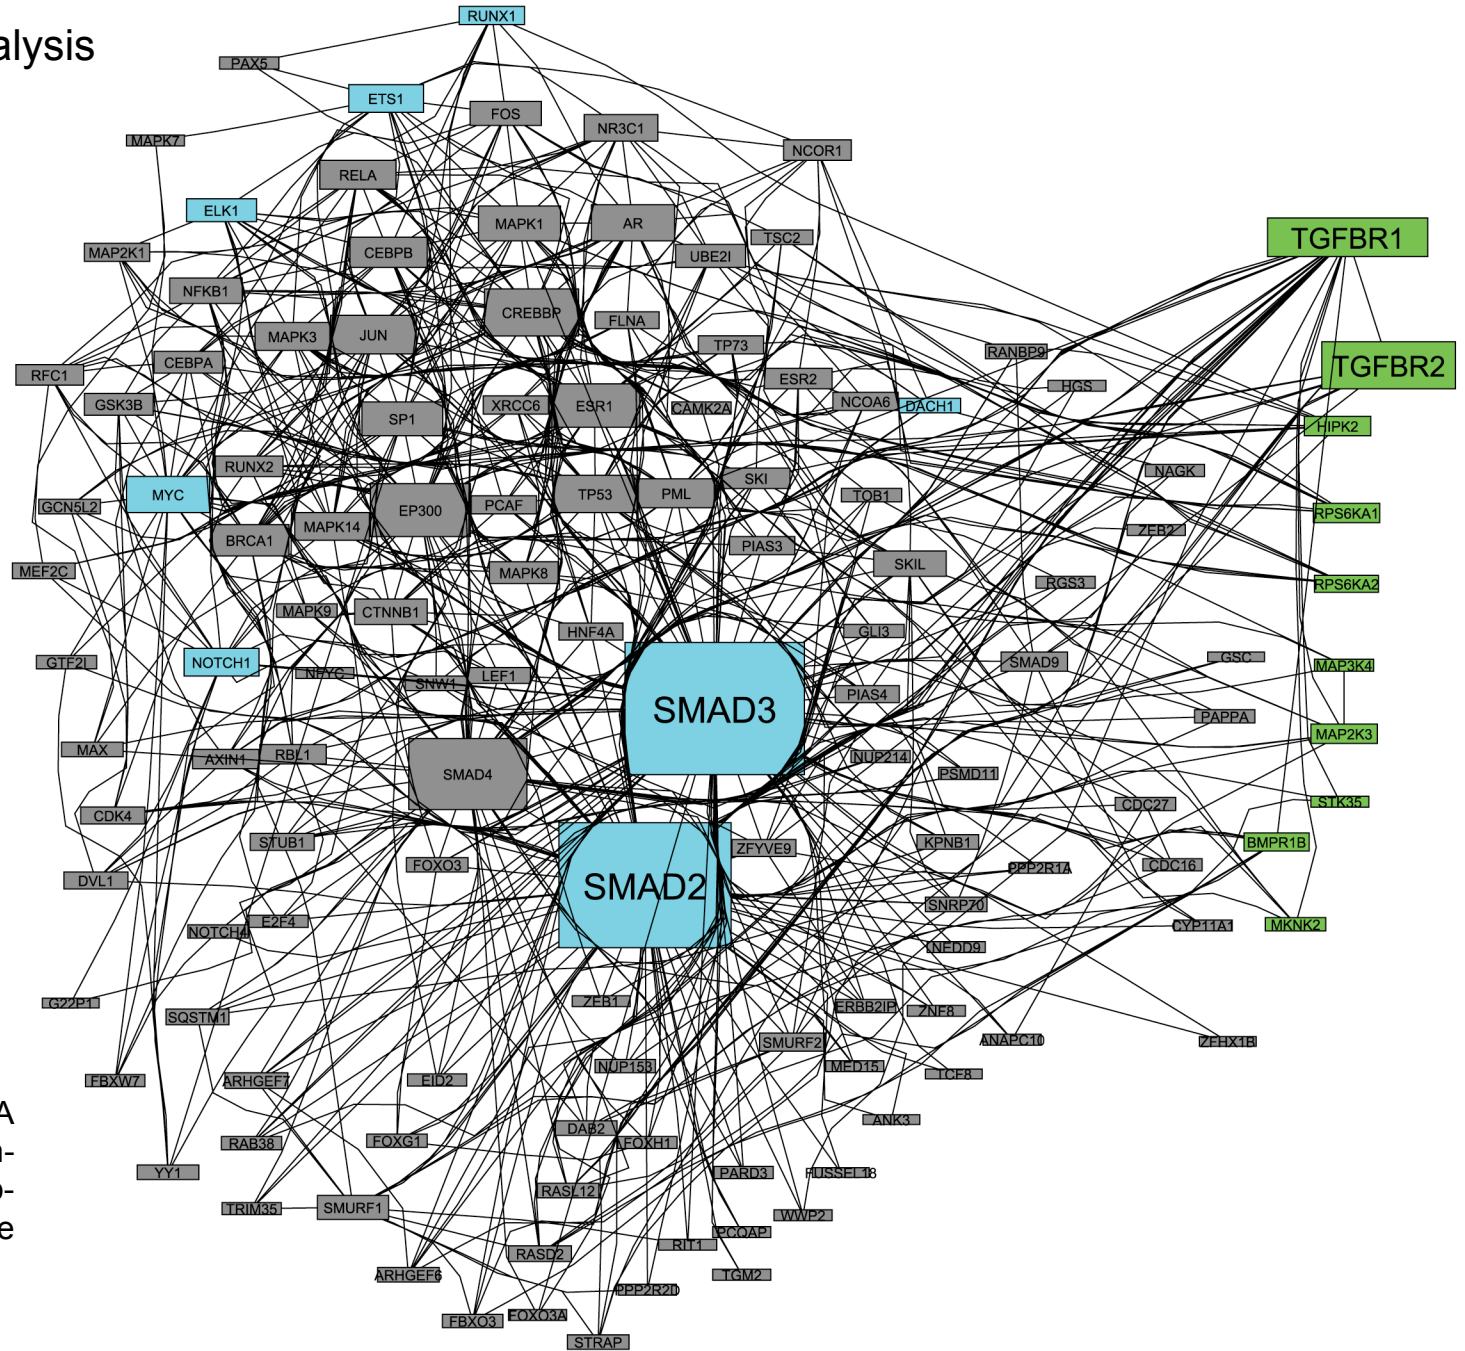

Supplementary figure 4: (A and B) Detailed protein-protein interaction sub-networks presented in figure 4.

# Supplementary Figure 4b

## Negative correlation analysis

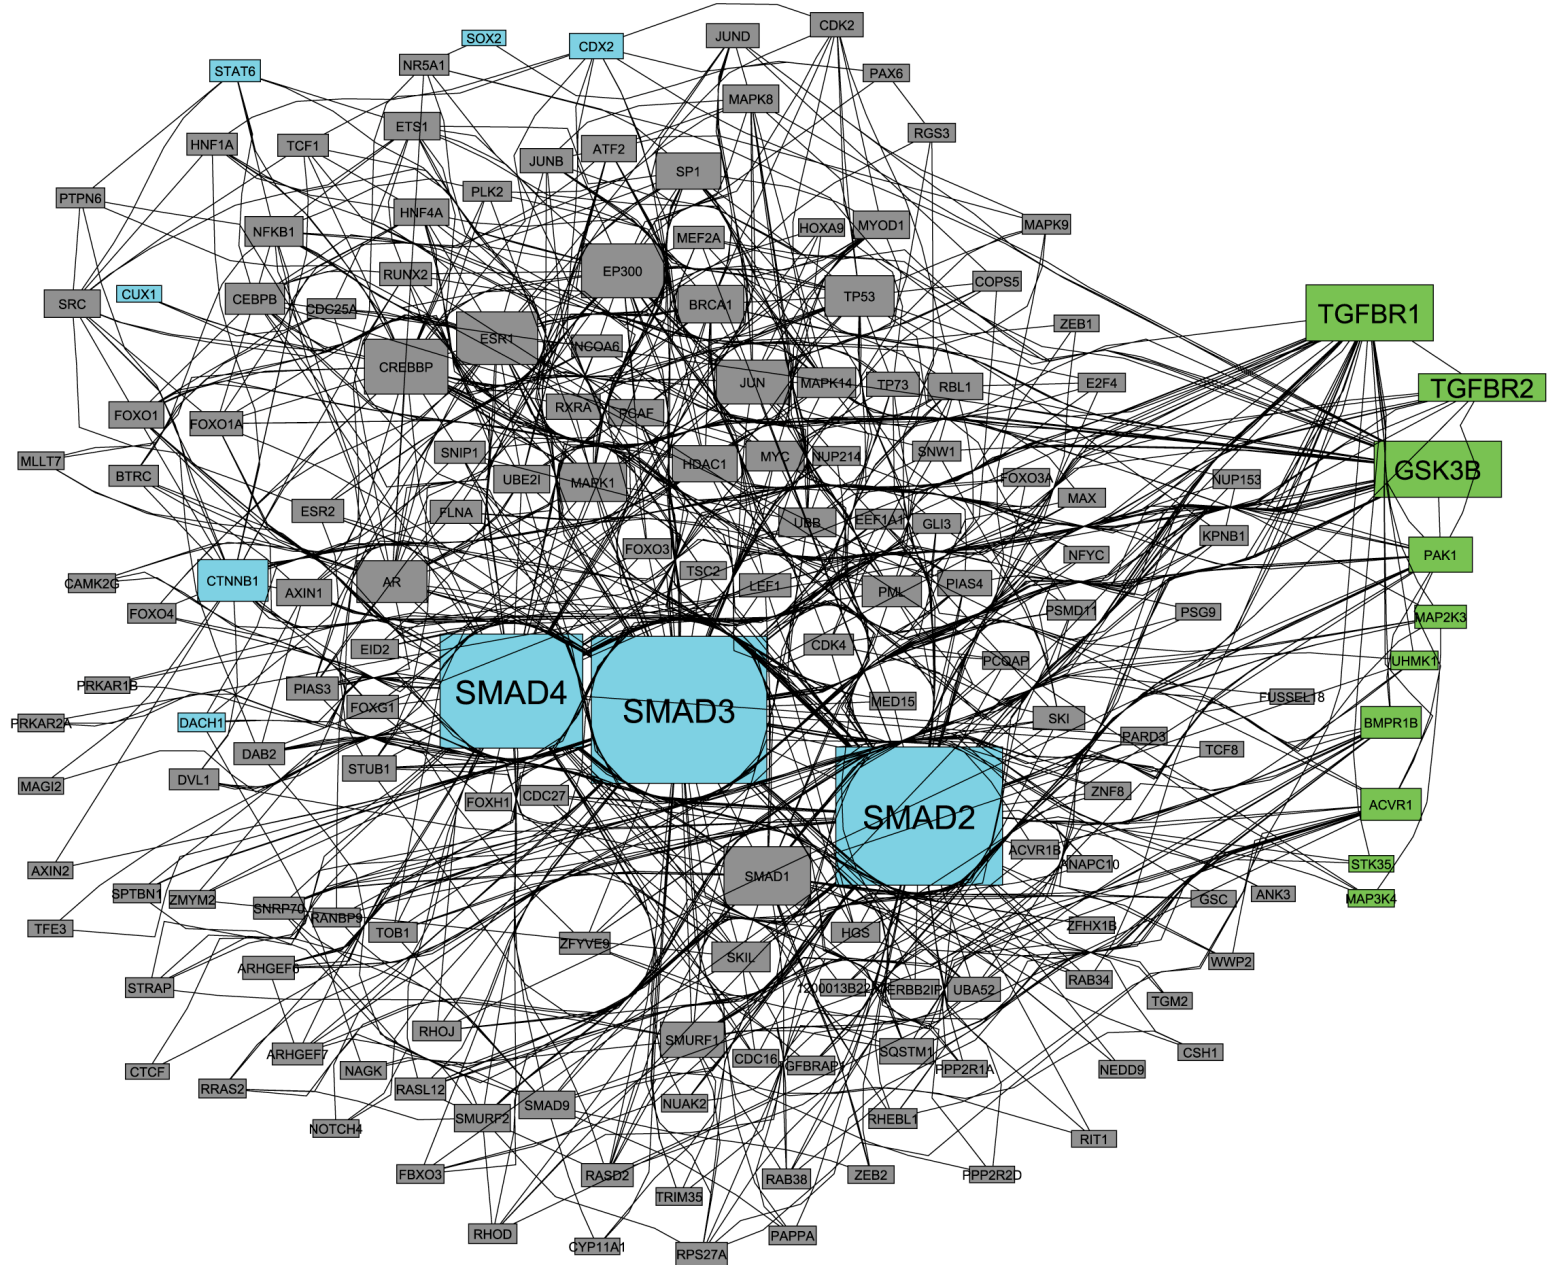

## Supplementary Figure 5

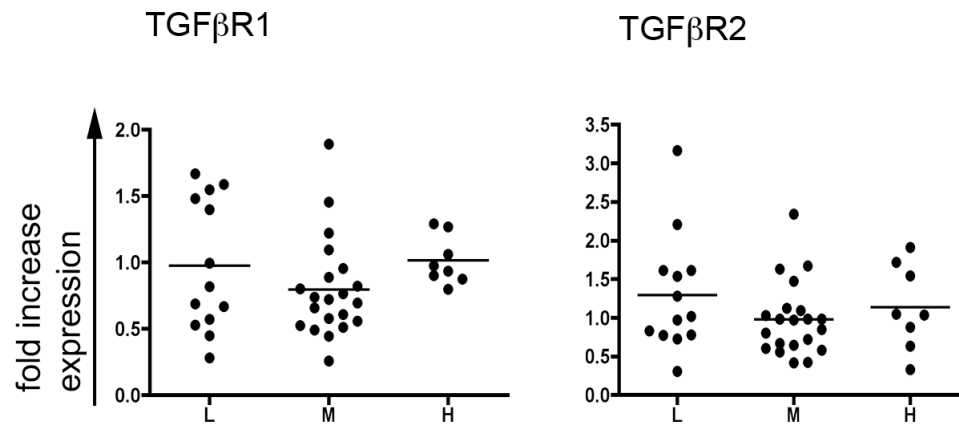

Supplementary figure 5: TGFBR mRNA levels. One million cells of low, medium and high CD8<sup>+</sup> Ts lines were stimulated with  $\alpha$ CD3/CD28 beads for 72h. mRNA was extracted and used as a template for cDNA. qPCR was performed to evaluate the expression levels of TGFBR1 and TGFBR2.

## Supplementary Figure 6

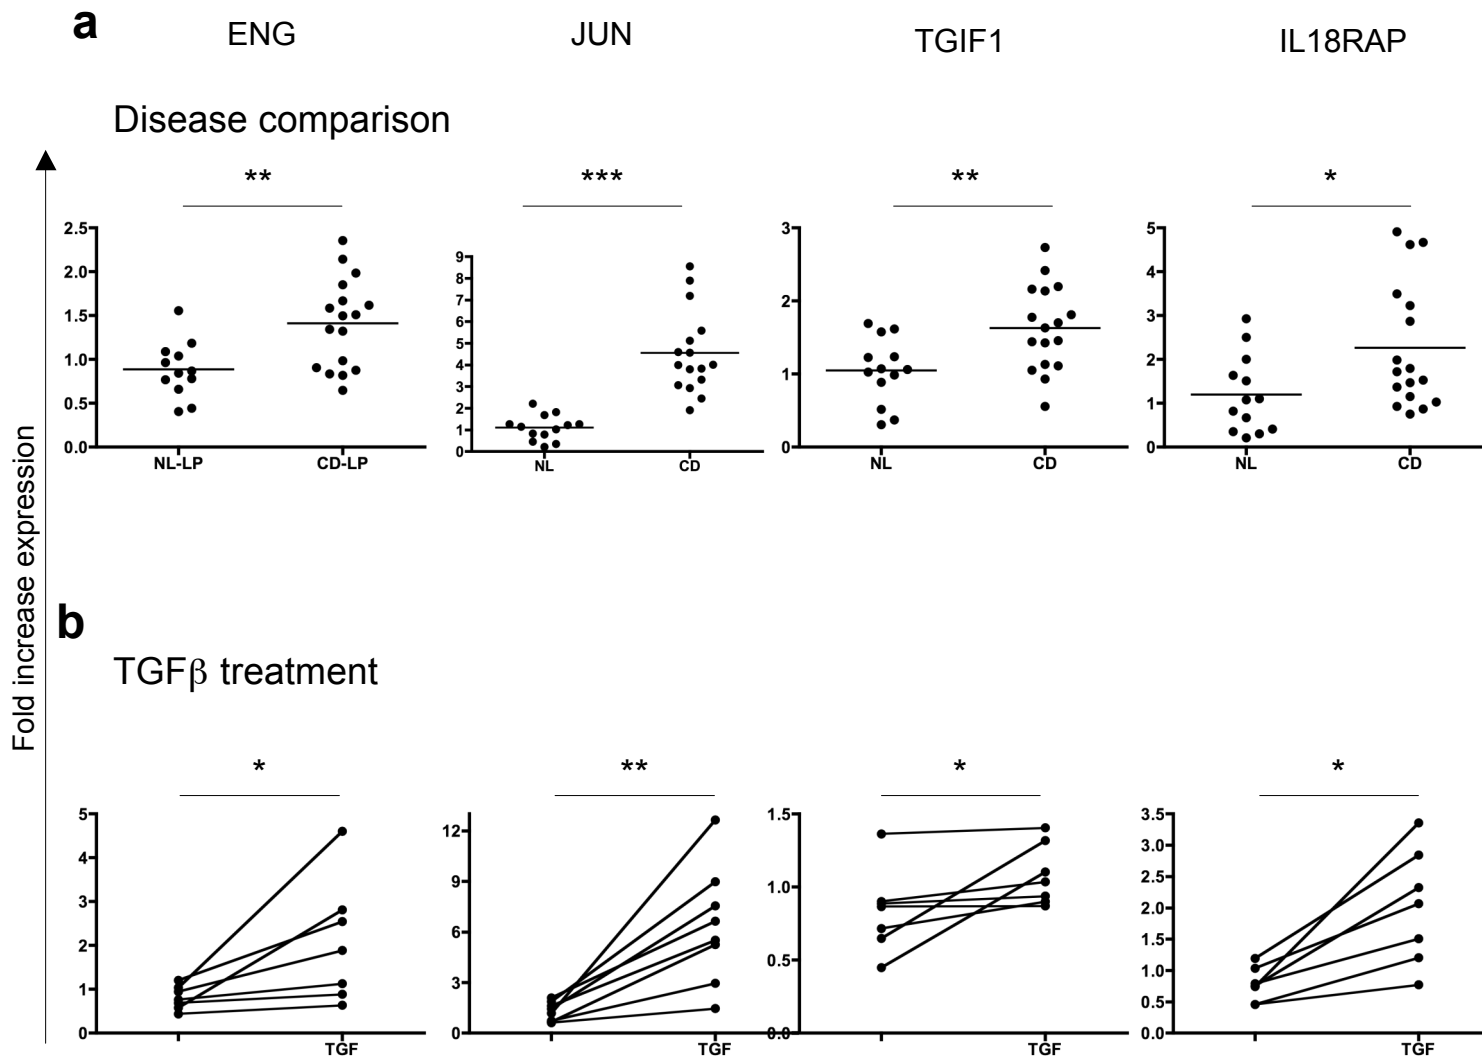

Supplementary figure 6: Validation of the microarray results. (A) One million cells of both NL and CD derived CD8<sup>+</sup> Ts lines were stimulated in the presence or absence of  $\alpha$ CD3/CD28 beads for 72h. mRNA was extracted and used as a template for cDNA. qPCR was performed to evaluate the expression levels of ENG, Jun, TGIF1 and IL18RAP, using an unpaired T test with Mann Whitney correction (B) One million cells of both NL and UC CD8<sup>+</sup> Ts lines were either stimulated in the presence or absence of TGF $\beta$  (2ng/ml) for 72h. mRNA was extracted and used as a template for cDNA. qPCR was performed to evaluate the expression levels of ENG, Jun, TGIF1 and IL18RAP, using non parametric Wilcoxon matched pairs T test. \*, p<0.05. \*\*, p<0.01. \*\*\*, p<0.001.



## Supplementary Figure 7

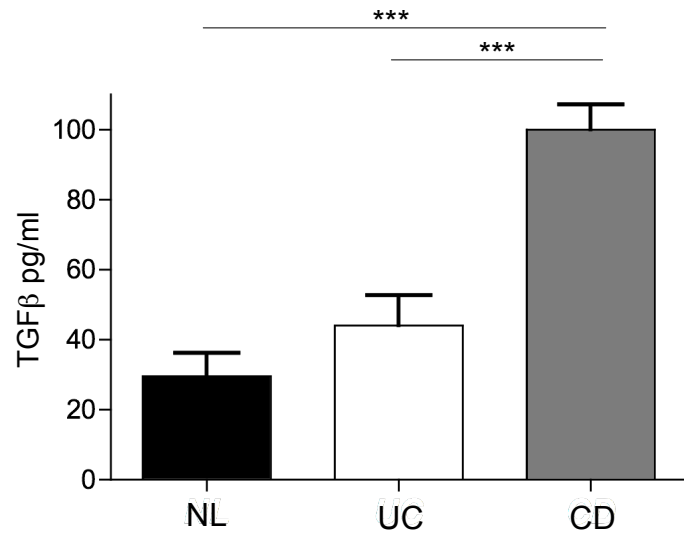

Supplementary figure 7: Bioactive levels of TGFβ in tissue explants derived from NL, UC and CD patients. Error bars represent standard deviation. \*\*\*, p<0.001, using a nonparametric test, one way analysis of variance, Bonferroni's post test correction.

## Supplementary Table 1a

| Stimulation                                        |                          |       |      | % of CD8+ T cells<br>after<br>15 days in culture |
|----------------------------------------------------|--------------------------|-------|------|--------------------------------------------------|
| Primary<br>stimulation<br>5 days w/<br>Visilizumab | Secondary<br>stimulation |       |      |                                                  |
|                                                    | Irradiated PBMCs         | IL-15 | IL-7 |                                                  |
| -                                                  | -                        | -     | -    | 11.76                                            |
| -                                                  | +                        | -     | -    | 6.19                                             |
| -                                                  | +                        | +     | -    | 15.62                                            |
| -                                                  | +                        | +     | +    | 16.94                                            |
| +                                                  | +                        | -     | -    | 30.43                                            |
| +                                                  | +                        | +     | -    | 56.27                                            |
| +                                                  | +                        | +     | +    | 48.6                                             |

## Supplementary Table 1b

|                               | NL            |                 | CD               |                 |
|-------------------------------|---------------|-----------------|------------------|-----------------|
|                               | % naïve cells | Patients number | % naïve cells    | Patients number |
| CD45Rhi<br>CD62L <sup>+</sup> | 6.44% ±8.3%   | 5               | 7.22% ±<br>6.62% | 6               |

Supplementary table 1: Assessment of CD8<sup>+</sup> T cells derived from different LP culture conditions (A) % of CD8<sup>+</sup> T cells at day 15 from different culture conditions. (B) % of naïve CD8<sup>+</sup> cells in freshly isolated LPLs derived from NL and CD patients. Naïve cells were defined as CD3<sup>+</sup> CD8<sup>+</sup> cells expressing high levels of CD45RA and CD62L.

## Supplementary Table 2

|                               | NL                  |                                     | UC                  |                                     | CD                 |                                     |
|-------------------------------|---------------------|-------------------------------------|---------------------|-------------------------------------|--------------------|-------------------------------------|
|                               | % in positive gate  | Number of CD8 <sup>+</sup> Ts lines | % in positive gate  | Number of CD8 <sup>+</sup> Ts lines | % in positive gate | Number of CD8 <sup>+</sup> Ts lines |
| CD8 $\beta$                   | 92.8% $\pm$ 6.25%   | 3                                   | 98.05% $\pm$ 1.77%  | 2                                   | 92.87% $\pm$ 0.85% | 3                                   |
| Integrin $\alpha$ 4 $\beta$ 7 | 99.5% $\pm$ 0.26%   | 3                                   | 99.07% $\pm$ 0.31%  | 3                                   | 99.43% $\pm$ 0.12% | 3                                   |
| CD101                         | 96.57% $\pm$ 2.72%  | 3                                   | 98.5% $\pm$ 1.41%   | 2                                   | 94.23% $\pm$ 8.78% | 3                                   |
| CD56                          | 39.31% $\pm$ 26.06% | 4                                   | 19.8% $\pm$ 10.04%  | 2                                   | 33.47% $\pm$ 5.88% | 3                                   |
| CD122                         | 16.33% $\pm$ 9.5%   | 4                                   | 10.75% $\pm$ 0.07%  | 2                                   | 17.43% $\pm$ 4.86% | 3                                   |
| FoxP3                         | 45.05% $\pm$ 14.11% | 6                                   | 32% $\pm$ 8.23%     | 3                                   | 25.8% $\pm$ 1.27%  | 2                                   |
| CD103                         | 11.9% $\pm$ 10.92%  | 3                                   | 4.16% $\pm$ 0.45%   | 2                                   | 9.18% $\pm$ 8%     | 3                                   |
| CD25                          | 30.37% $\pm$ 6.82%  | 3                                   | 34.97% $\pm$ 26.48% | 3                                   | 24.8% $\pm$ 12.98% | 3                                   |

Supplementary table 2: detailed summary table for figure 3B, indicating the number of cell lines stained for a specific cell marker, as well as % of cells in the positive gate based on the type of cell lines stained NL, UC or CD.
